# Supplementary material
Source: MDPI journal article supplement (https://www.mdpi.com/2072-4292/14/23/6163)
Supplement: s1 [file s1]

## Supplementary Materials

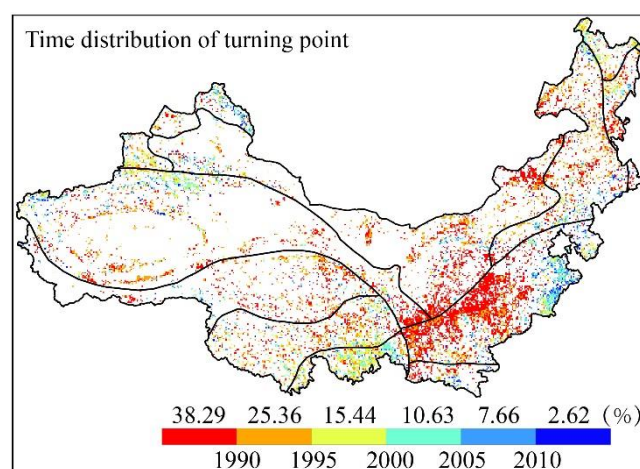

**Figure S1.** The timing of the turning points of NDVI in growing season with EEMD method ( $p < 0.05$ ).

**Table S1.** Statistical proportion of NDVI EEMD trend in vegetation growing season under different climatic zones

|               |                  | Nonlinear trend base on EEMD |        |        |        |        | Proportion (%) |
|---------------|------------------|------------------------------|--------|--------|--------|--------|----------------|
| Climate zones | Land cover types | Non-sig                      | G to B | B to G | G to G | B to B |                |
| CTH           | Cropland         | 50                           | 50     | 0      | 0      | 0      | 0.89           |
|               | Woodland         | 52.37                        | 29.33  | 2.37   | 15.79  | 0.14   | 79.56          |
|               | Grassland        | 51.14                        | 30.68  | 2.84   | 15.34  | 0      | 19.55          |
| MTH           | Cropland         | 0                            | 0      | 0      | 0      | 0      | 0              |
|               | Woodland         | 33.33                        | 60.00  | 0      | 6.67   | 0      | 62.50          |
|               | Grassland        | 66.67                        | 33.33  | 0      | 0      | 0      | 37.50          |
| MTSH          | Cropland         | 28.25                        | 6.32   | 31.60  | 25.65  | 8.18   | 25.00          |
|               | Woodland         | 51.31                        | 17.72  | 13.43  | 14.18  | 3.36   | 49.81          |
|               | Grassland        | 39.11                        | 16.61  | 21.03  | 18.82  | 4.43   | 25.19          |
| MTSA          | Cropland         | 44.09                        | 17.22  | 9.56   | 27.96  | 1.17   | 15.66          |
|               | Woodland         | 53.01                        | 24.04  | 7.33   | 13.20  | 2.42   | 20.44          |
|               | Grassland        | 58.70                        | 15.29  | 12.73  | 11.60  | 1.68   | 63.90          |
| MTA           | Cropland         | 30.35                        | 17.62  | 17.62  | 33.71  | 0.70   | 12.43          |
|               | Woodland         | 36.20                        | 15.95  | 20.85  | 23.93  | 3.07   | 2.84           |
|               | Grassland        | 48.97                        | 6.59   | 27.52  | 16.08  | 0.84   | 84.73          |
| WTSH          | Cropland         | 17.30                        | 20.60  | 28.90  | 32.68  | 0.52   | 46.31          |
|               | Woodland         | 26.53                        | 9.93   | 22.02  | 41.52  | 0      | 21.78          |
|               | Grassland        | 14.44                        | 5.64   | 37.86  | 42.06  | 0      | 31.91          |
| WTA           | Cropland         | 17.46                        | 19.60  | 19.91  | 42.42  | 0.61   | 12.76          |
|               | Woodland         | 43.54                        | 21.77  | 20.75  | 10.54  | 3.40   | 5.74           |
|               | Grassland        | 38.29                        | 17.78  | 25.85  | 16.28  | 1.80   | 81.50          |
| PCSH          | Cropland         | 14.81                        | 9.88   | 37.04  | 38.27  | 0      | 5.10           |
|               | Woodland         | 36.43                        | 50.35  | 4.29   | 8.93   | 0      | 17.63          |

|      |           |       |       |       |       |      |       |
|------|-----------|-------|-------|-------|-------|------|-------|
|      | Grassland | 41.65 | 48.49 | 2.36  | 6.60  | 0.90 | 77.27 |
| PCSA | Cropland  | 39.47 | 14.47 | 17.11 | 28.95 | 0    | 3.69  |
|      | Woodland  | 49.49 | 35.15 | 5.81  | 8.53  | 1.02 | 7.11  |
|      | Grassland | 54.88 | 18.09 | 12.73 | 12.86 | 1.44 | 89.20 |
| PCA  | Cropland  | 31.11 | 11.11 | 17.78 | 40    | 0    | 1.87  |
|      | Woodland  | 53.69 | 12.08 | 17.45 | 14.77 | 2.01 | 6.22  |
|      | Grassland | 32.18 | 8.72  | 31.28 | 27.55 | 0.27 | 91.91 |
| SH   | Cropland  | 18.82 | 8.12  | 11.44 | 61.62 | 0    | 24.26 |
|      | Woodland  | 35.33 | 9.97  | 10.54 | 44.16 | 0    | 31.42 |
|      | Grassland | 19.19 | 6.87  | 15.15 | 58.79 | 0    | 44.32 |

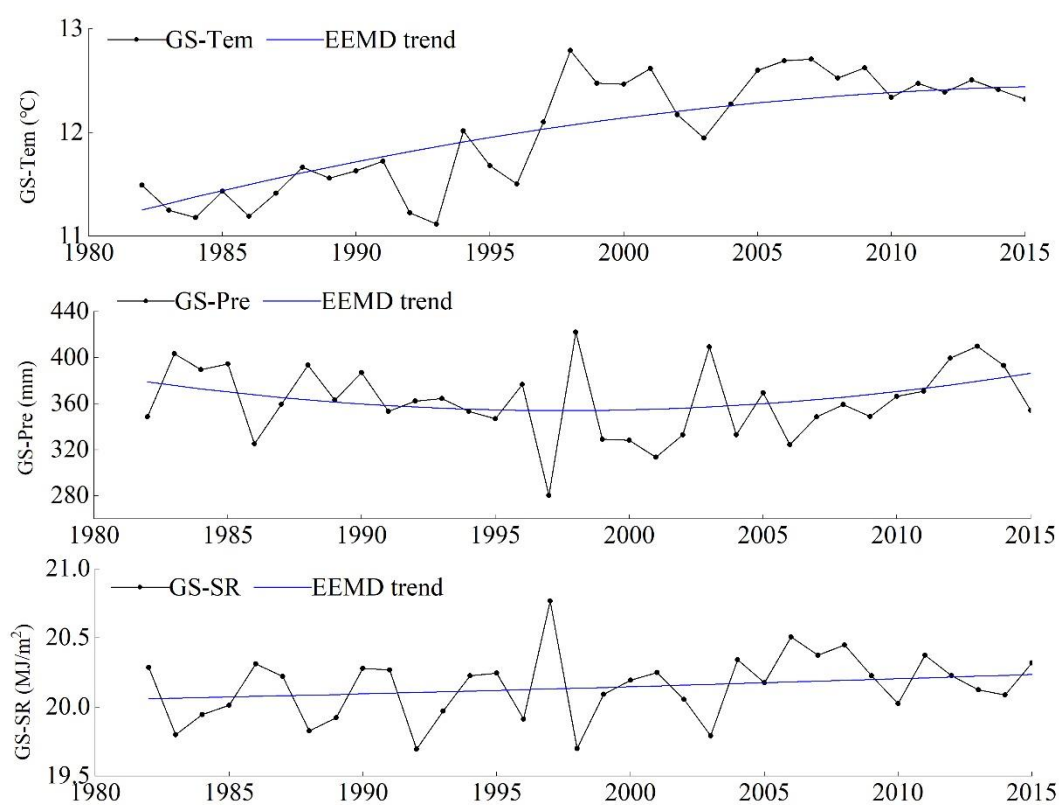

**Figure S2.** EEMD long-term trend of temperature, precipitation and solar radiation in the study area from 1982 to 2015.
